# Supplementary material for: Altered Circadian Rhythm and Metabolic Gene Profile in Rats Subjected to Advanced Light Phase Shifts
Source: PubMed Central journal article supplement (PMC4383616; doi:10.1371/journal.pone.0122570), 2015-04-02
Supplement: pone.0122570.s004.pdf [file pone.0122570.s004.pdf]

**S1 Table**

|                            | <b>Control</b>     | <b>Advanced</b>    |
|----------------------------|--------------------|--------------------|
| <b>FGF21 (U/ml)</b>        | 46.33 ( $\pm$ 4.7) | 56.87 ( $\pm$ 12)  |
| <b>NEFA (mM)</b>           | 1.09 ( $\pm$ 0.11) | 1.17 ( $\pm$ 0.14) |
| <b>Cholesterol (mg/ml)</b> | 86.16 ( $\pm$ 3)   | 81.58 ( $\pm$ 7.7) |
| <b>TAG (mg/ml)</b>         | 6 ( $\pm$ 1.3)     | 6.84 ( $\pm$ 1.05) |
